# Supplementary material for: Long-Term Trends in Midwestern Milkweed Abundances and Their Relevance to Monarch Butterfly Declines
Source: Oxford University Press journal article supplement (doi:10.1093/biosci/biw186), 2017-03-08
Supplement: biw186_Supp.zip [file biw186_Supp.zip]

Archive with 5 entries (5 files):
- Asclepias syriacus Scrub oak sand prairie nature preserve.jpg
- monarch new england aster.jpg
- Pearse_artwork policy_signed.pdf
- supplementaryTables_20161130_AsSub.docx
- supplementaryTables_20170225.docx
