# Supplementary material for: Long-Term Trends in Midwestern Milkweed Abundances and Their Relevance to Monarch Butterfly Declines
Source: Oxford University Press journal article supplement (doi:10.1093/biosci/biw186), 2017-03-08
Supplement: biw186_Supp.zip [file biw186_Supp.zip › Pearse_artwork policy_signed.pdf]

## BioScience Policy on Artwork

Artwork submitted for publication should be of the highest quality, with a minimum resolution of 600 dpi for black and white line art and 400 dpi for color at 4" by 6" for figures intended to run within the article, and the same resolution at 8" by 11" for figures intended for the cover. BioScience does not redraw author artwork. Images for the cover of BioScience should have a vertical orientation. Please supply electronic figures in **.eps format only**; .jpg and .ppt files will not be accepted. All photographs should be in .tif format.

**Color figures:** There is an author fee of \$700 for the first piece of color artwork and \$250 for each additional piece. Artwork should suit the manner in which it will be published—do not, for example, use differently colored bars or lines in a graph that will be published in black and white; use dots, crosshatching, etc. instead. There is no fee for the use of color in an image selected for the cover of BioScience.

**WARRANTY:** You warrant that all art items are your original work, or that you have provided BioScience with a Third-Party Media Permissions Contract signed by the copyright owners to republish or adapt, in both print and online formats, all items subject to copyright.

## Author Artwork Agreement

Authors \_\_\_\_\_

Manuscript title \_\_\_\_\_

Manuscript number \_\_\_\_\_

### To the Editor:

Please print each figure in black and white or color, as indicated (by an X mark). I understand that a fee of \$700 for the first color image and \$250 for each additional color image will be due upon acceptance.

\_\_\_\_\_  
Signature of corresponding author

\_\_\_\_\_  
Date

| Figure | Black/White | Color | Figure | Black/White | Color |
|--------|-------------|-------|--------|-------------|-------|
| 1.     | _____       | _____ | 9.     | _____       | _____ |
| 2.     | _____       | _____ | 10.    | _____       | _____ |
| 3.     | _____       | _____ | 11.    | _____       | _____ |
| 4.     | _____       | _____ | 12.    | _____       | _____ |
| 5.     | _____       | _____ | 13.    | _____       | _____ |
| 6.     | _____       | _____ | 14.    | _____       | _____ |
| 7.     | _____       | _____ | 15.    | _____       | _____ |
| 8.     | _____       | _____ | 16.    | _____       | _____ |
