# Supplementary material for: Long-Term Trends in Midwestern Milkweed Abundances and Their Relevance to Monarch Butterfly Declines
Source: Oxford University Press journal article supplement (doi:10.1093/biosci/biw186), 2017-03-08
Supplement: biw186_Supp.zip [file biw186_Supp.zip › supplementaryTables_20170225.docx]

**Supplemental Figure S1.** Cover of the four most abundant milkweed species in Illinois natural areas. Values take into account species’ combined abundances in forests, wetlands, and grassland, and the change in the cover of habitats over time across Illinois (using Best Estimate scenario habitat cover values).


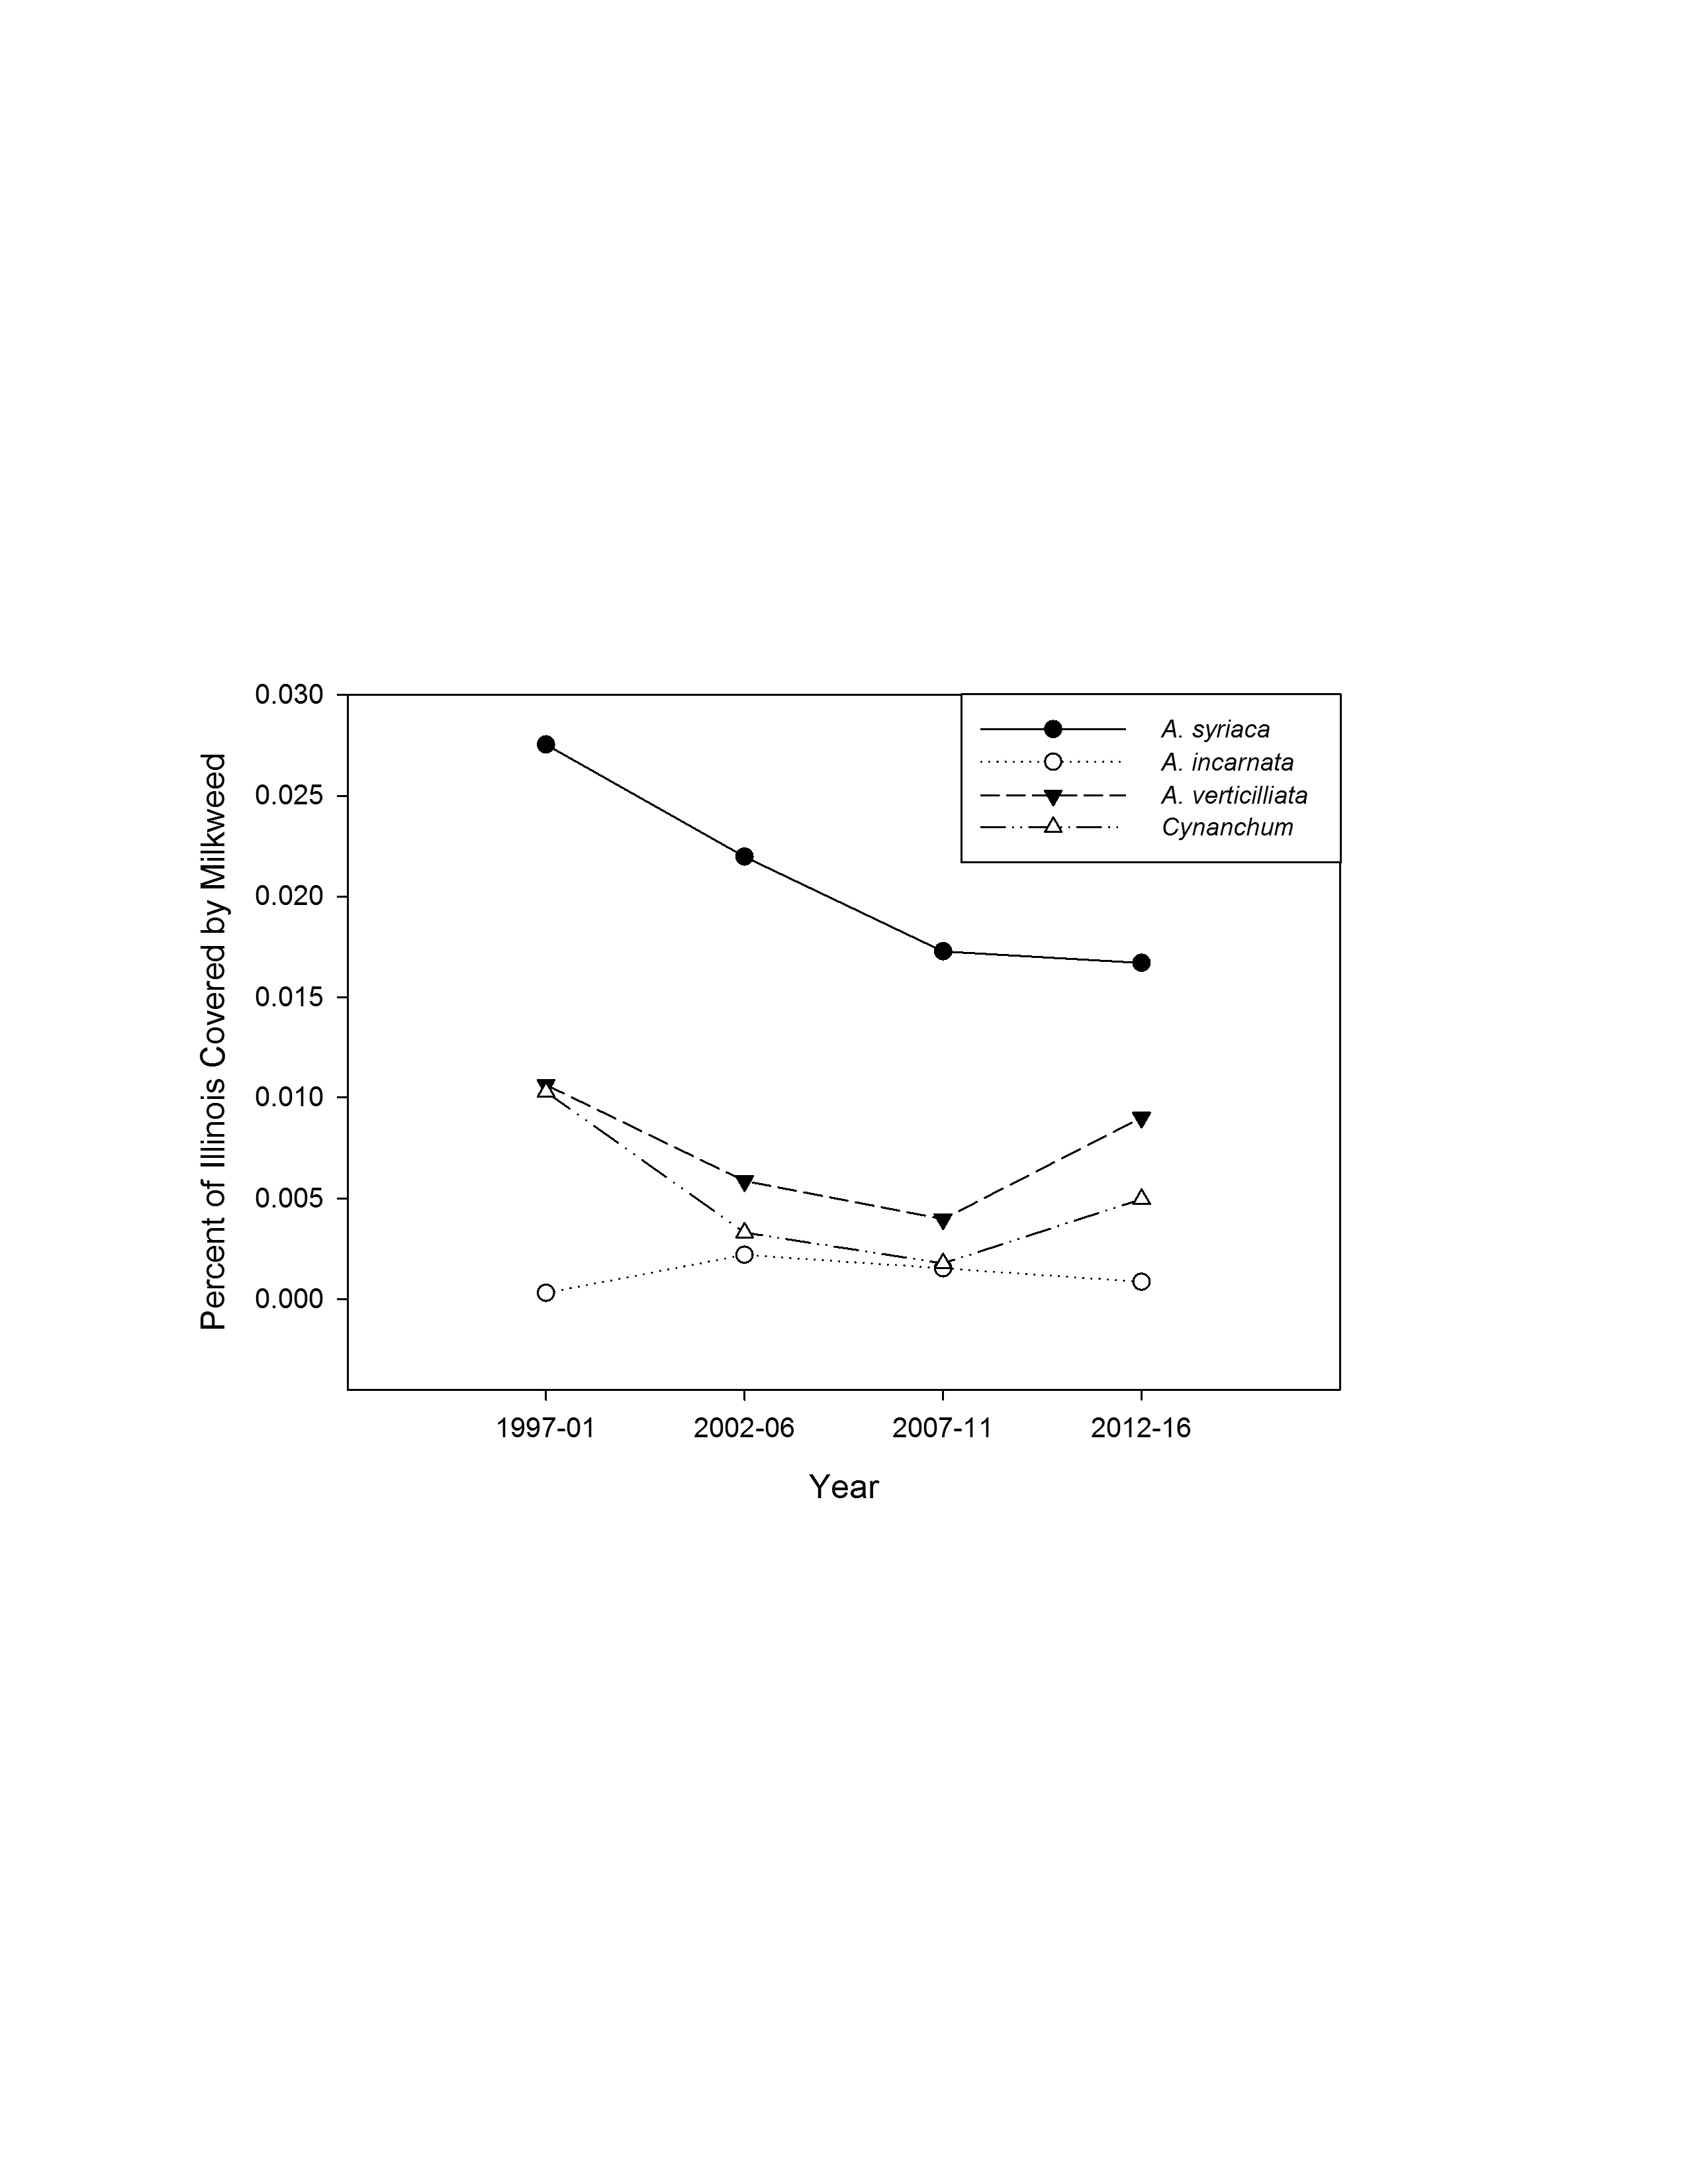


**Supplemental Figure S2.** Cover of milkweeds in Illinois by habitat type. Values take into account combined species abundances and the change in cover of each habitat type over time across Illinois (using Best Estimate scenario habitat cover values). All species are combined in a given habitat. Solid lines represent aggregated values across dominant natural habitats or cropland.


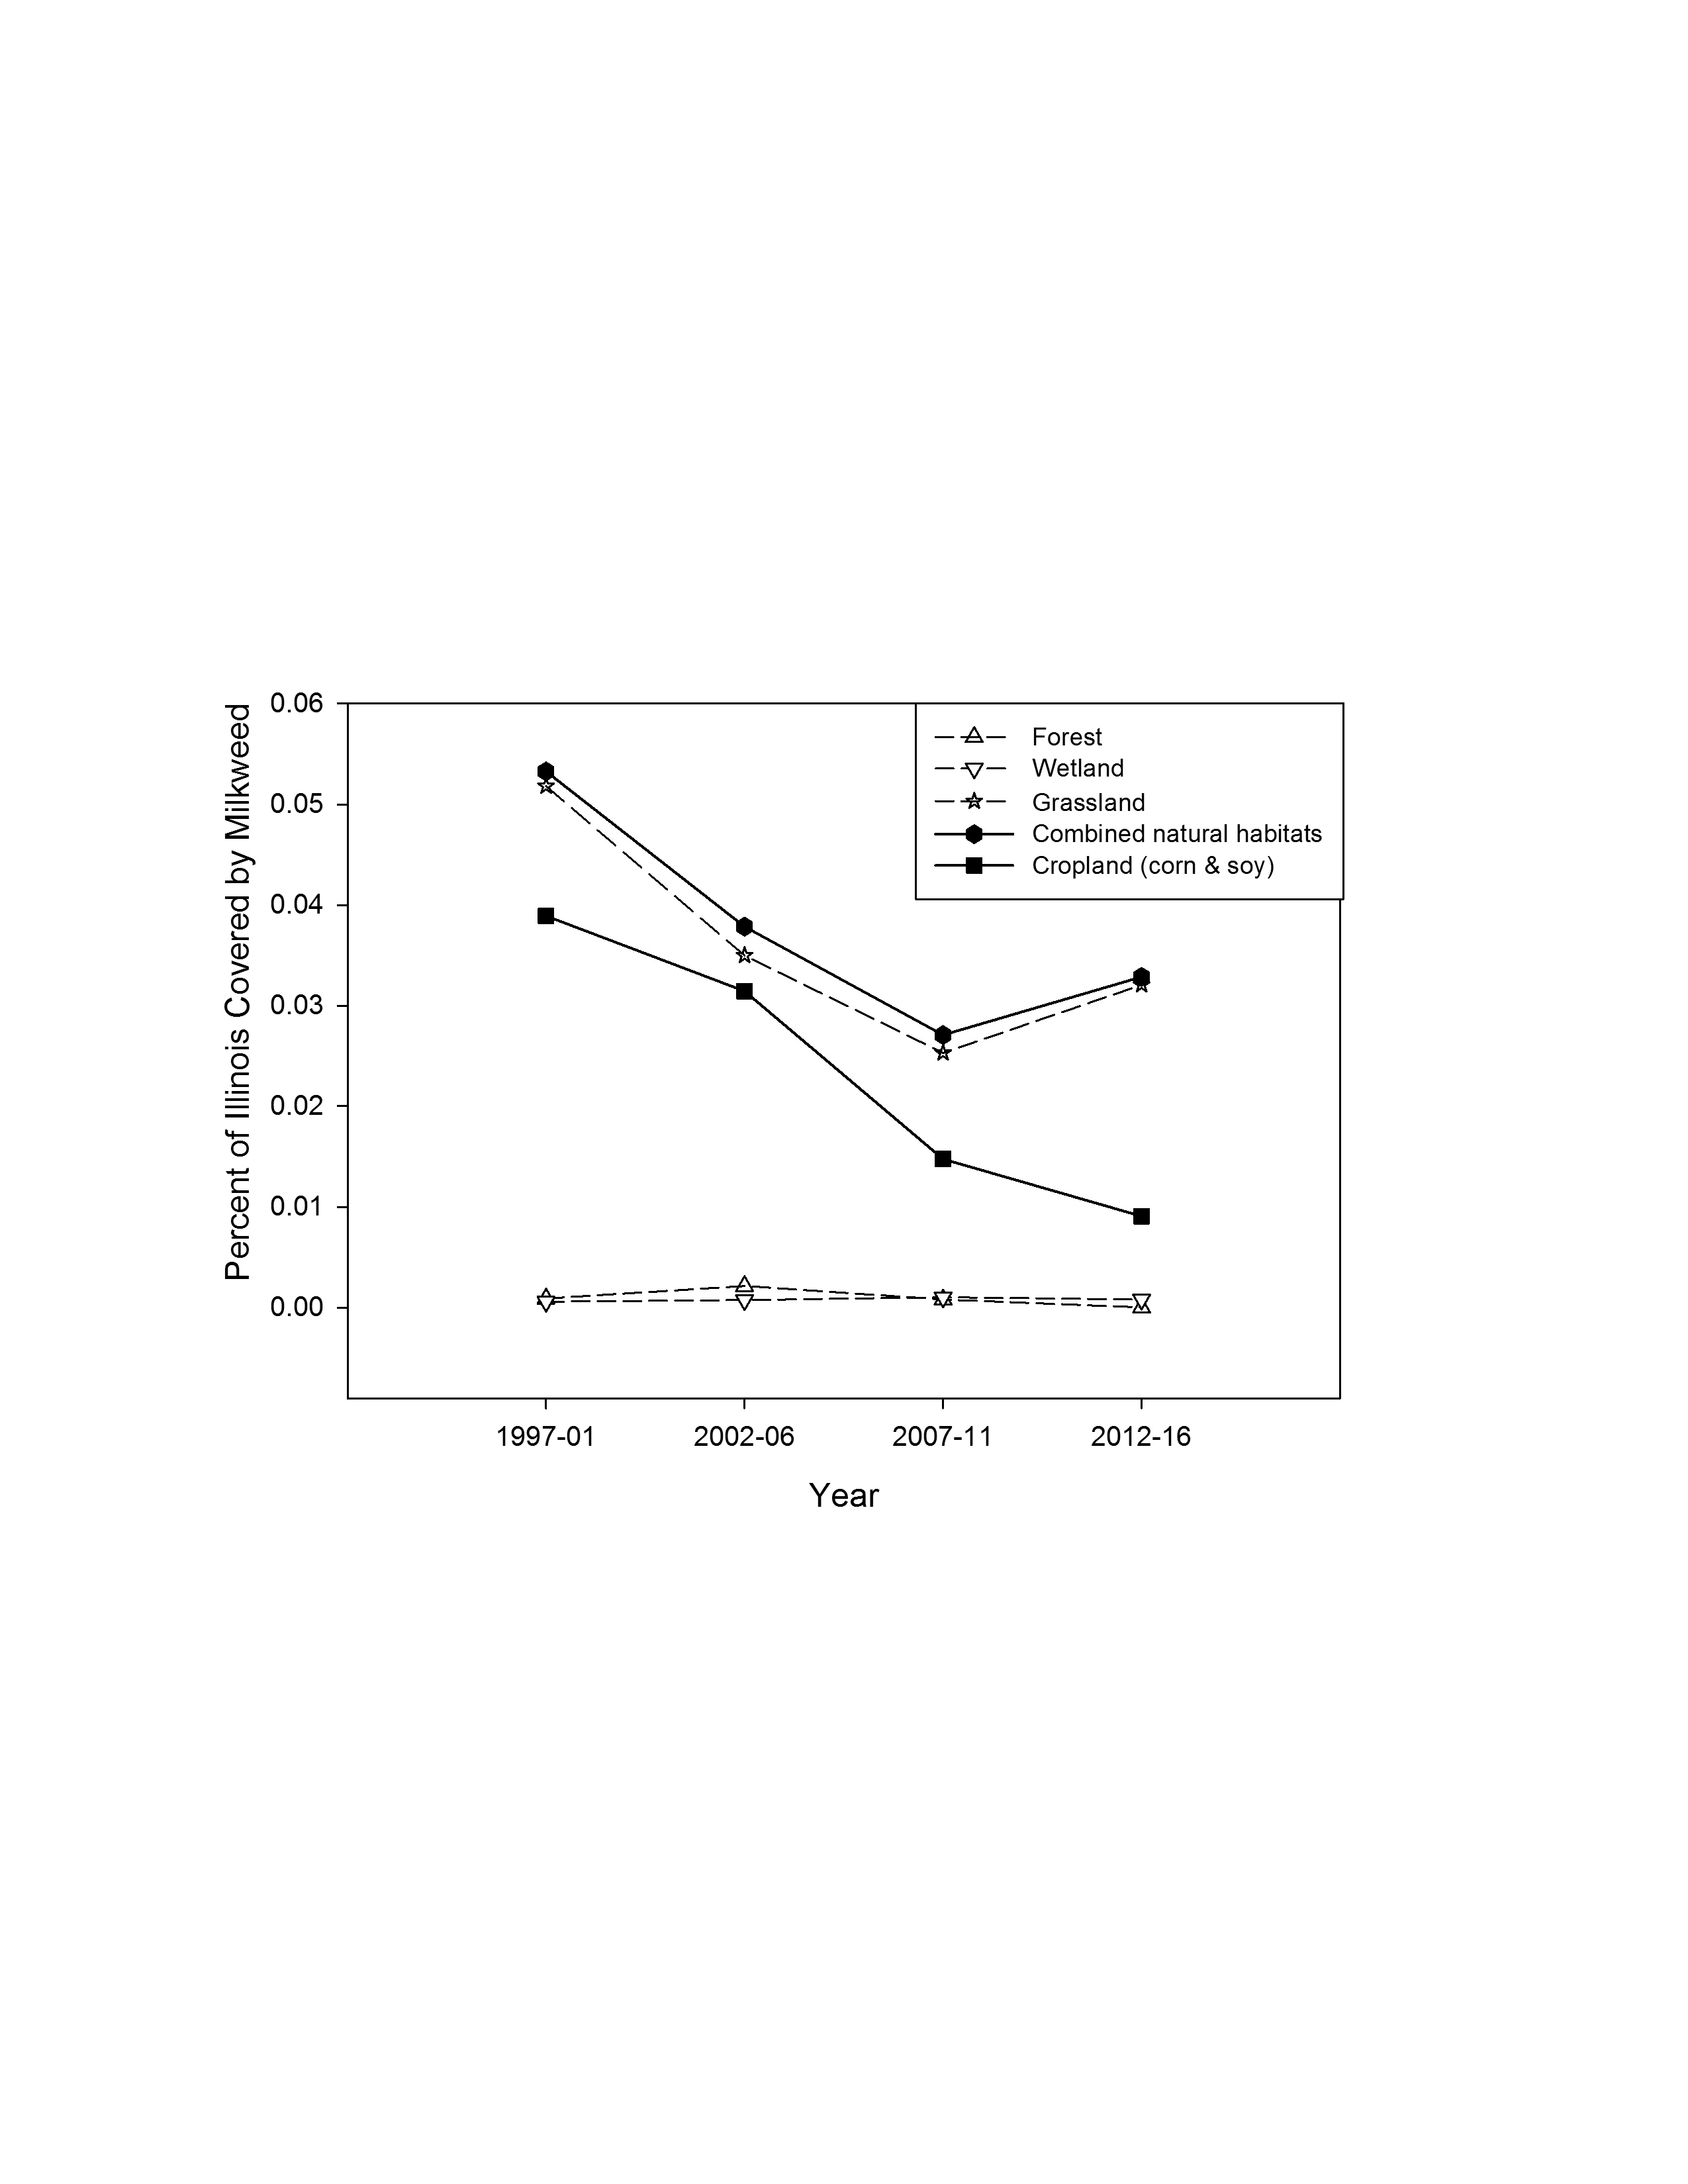


**Supplemental Table S1**. Pre-glyphosate abundances of *A. syriaca* in Illinois croplands in milkweed shoots / acre.

|  | **Corn** | | | **Soybeans** | | |
| --- | --- | --- | --- | --- | --- | --- |
| Year |  | 1965-19701 |  |  | 1990-19912 |  |
|  | Major herbicide | Minor herbicide | No herbicide | Major herbicide | Minor herbicide | No herbicide |
| Mean | 4.5 | 160.5 | 148.0 | 0.0 | 106.7 | 0.0 |
| S.D. | 9.1 | 158.2 | 191.8 | 0.0 | 150.8 | 0.0 |
|  |  |  |  |  |  |  |
| Year |  | 1990-19912 |  |  | 1990-19912 |  |
|  | Herbicide |  | No herbicide | Herbicide |  | No herbicide |
| Mean | 0 |  | 0 | 41.73 |  | 1253 |
| S.D. | 0 |  | 0 | 204.1 |  | 353.6 |
| 1. From Houghton (1973); 2. From Allen (1992); 3. Note that mean is based on one milkweed stem in one small plot. | | | | | | |

**Supplemental Table S2**. Summary data for post-glyphosate abundances of *A. syriaca* in Illinois croplands. Data from Schutte et al. (2010).

| **Statistic** | **Value** |
| --- | --- |
| Sites surveyed | 133 |
| Sites *A. syriaca* present | 9 |
| Mean density (stems / ha) | 8.51 |
| Std. dev. density (stems / ha) | 38.74 |
| Maximum density (stems / ha) | 302.63 |

**Supplemental Table S3**. Abundance of Illinois' milkweed species in forests, grasslands, and wetlands. Refer to Supplemental Table S4 for the number of sites surveyed during each CTAP cycle for each habitat type. **These were either *A. purpurascens* or *A. syriaca* seedlings that were too young for definitive identification.

|  | **Cycle 1 (1997-2001)** | | **Cycle 2 (2002-06)** | | **Cycle 3 (2007-11)** | | **Cycle 4 (2012-16)** | |
| --- | --- | --- | --- | --- | --- | --- | --- | --- |
|  | **% sites** | **mean % cover / site** | **% sites** | **mean % cover / site** | **% sites** | **mean % cover / site** | **% sites** | **mean % cover / site** |
| **Forests** |  |  |  |  |  |  |  |  |
| *A. exaltata* | 0.0150 | 0.0061 | 0 | 0 | 0 | 0 | 0 | 0 |
| *A. quadrifolia* | 0 | 0 | 0.0133 | 0.0113 | 0.0201 | 0.0054 | 0 | 0 |
| *A. sp.*** | 0 | 0 | 0.0067 | 0.0033 | 0 | 0 | 0 | 0 |
| **Grasslands**  *A. hirtella* | 0 | 0 | 0.0134 | 0.0161 | 0.0074 | 0.0096 | 0 | 0 |
| *A. incarnata* | 0.0078 | 0.0012 | 0.0201 | 0.0133 | 0.0221 | 0.0075 | 0.0284 | 0.0043 |
| *A. purpurascens* | 0.0078 | 0.0258 | 0 | 0 | 0 | 0 | 0 | 0 |
| *A. sp.*** | 0.0078 | 0.0012 | 0 | 0 | 0.0147 | 0.0035 | 0 | 0 |
| *A. sullivantii* | 0 | 0 | 0 | 0 | 0 | 0 | 0.0071 | 0.0011 |
| *A. syriaca* | 0.1797 | 0.2033 | 0.1342 | 0.1465 | 0.1324 | 0.1233 | 0.2057 | 0.1291 |
| *A. tuberosa* | 0 | 0 | 0 | 0 | 0 | 0 | 0.0213 | 0.0085 |
| *A. verticillata* | 0.0625 | 0.0785 | 0.0872 | 0.0388 | 0.0662 | 0.0285 | 0.0851 | 0.0702 |
| *A. viridis* | 0 | 0 | 0 | 0 | 0 | 0 | 0.0071 | 0.0011 |
| *C. laeve* | 0.0625 | 0.0746 | 0.0403 | 0.0201 | 0.0515 | 0.0118 | 0.0426 | 0.0383 |
| **Wetlands**  *A. incarnata* | 0.0360 | 0.0309 | 0.0537 | 0.0466 | 0.1367 | 0.1067 | 0.0538 | 0.0675 |
| *A. syriaca* | 0.0288 | 0.0336 | 0.0268 | 0.0337 | 0.0647 | 0.0712 | 0.0538 | 0.0675 |
| *A. verticillata* | 0.0144 | 0.0128 | 0.0067 | 0.0176 | 0.0072 | 0.0108 | 0.0077 | 0.0173 |
| *C. laeve* | 0.0288 | 0.0513 | 0.0268 | 0.0644 | 0.0144 | 0.0335 | 0.0385 | 0.0213 |

**Supplemental Table S4**. The number of CTAP study sites with vegetation surveys, per 5-year cycle.

| **Years** | **Forest** | **Grassland** | **Wetland** |
| --- | --- | --- | --- |
| 1997-2001 | 133 | 128 | 139 |
| 2002-2006 | 150 | 149 | 149 |
| 2007-2011 | 149 | 136 | 139 |
| 2012-2016 | 152 | 141 | 130 |
| Total (unique sites) | 160 | 198 | 187 |

**Supplemental Table S5**. Estimates of Illinois area (%) covered by palustrine emergent wetlands dominated by herbaceous vegetation (Carroll et al. 2002), and forests (Illinois Gap Analysis Program spatial dataset; Illinois Natural History Survey 2003). The same values were used for every MRU scenario.

| **Habitat** | **Area** |
| --- | --- |
| Forest | 14.6 |
| Wetland | 0.45 |

**Supplemental Table S6**. Relative host use coefficients (HU) by monarch butterfly larvae, within each published study. Values were defined for each milkweed species encountered in CTAP surveys. All values are relative to *A. syriaca*, which was standardized as HU=1. A dash (-) is used to indicate when a species was not included in a study. **Chaplin and Walker (1982) did not sample *A. syriaca* so a HU relative to *A. quadrifolia* could not be determined, but because they found substantial monarch use of *A. quadrifolia* we used the median of non-zero HU values for that species. ***Mean of *A. syriaca* and *A. purpurascens*.

| **Species** | **Price & Willson 1979** | **Betz et al. 1989** | **Bartholomew & Yeargan 2001** | **Roels 2011** | **Chaplin & Walker 1982** | **Mean relative HU** |
| --- | --- | --- | --- | --- | --- | --- |
| *A. syriaca* | 1 | 1 | 1 | 1 | - | 1 |
| *A. exaltata* | - | 0 | - | - | - | 0 |
| *A. hirtella* | - | 0 | - | - | - | 0 |
| *A. incarnata* | 3.75 | 0.45 | - | - | - | 2.10 |
| *A. purpurescens* | - | 0.55 | - | - | - | 0.55 |
| *A. quadrifolia*** | - | - | - | - | > 0 | 0.70 |
| *A. sullivantii* | 0 | 0.88 | - | - | - | 0.44 |
| *A. tuberosa* | 2.70 | 0.85 | - | - | - | 1.78 |
| *A. verticillata* | 0.15 | 0.03 | - | - | - | 0.09 |
| *A. viridiflora* | - | 0 | - | - | - | 0 |
| *A. viridis* | - | - | - | 0.26 | - | 0.26 |
| *C. laeve* | - | - | 0.85 | - | - | 0.85 |
| unknown*** | - | - | - | - | - | 0.78 |

**Supplemental Table S7**. Estimates of Illinois area (%) covered by grasslands for each of the scenarios used to estimate MRU. The initial value for the optimistic scenario was derived from the mean value for the USDA National Agricultural Statistics Service’s Cropland Data Layer (NASS CDL), taking the mean value for "developed/open space" and "grasslands” from 1999-2016. The optimistic scenario assumed no decline in grasslands over time. The initial value for the best estimate scenario was derived from the Illinois Gap Analysis Project spatial data set (Illinois Natural History Survey 2003), change through time follows the rate of change (in 5-year increments) in grassland habitat from NASS CDL. Initial values for the pessimistic scenario were based on the Landcover of Illinois 1999-2000 spatial data set (Illinois Natural History Survey 2001), and change through time follows USDA Natural Resources Conservation Service’s 2015 National Resources Inventory for CRP and pastureland combined.

|  | **Scenario** | | |
| --- | --- | --- | --- |
| **Years** | **Optimistic** | **Best estimate** | **Pessimistic** |
| 1997-2001 | 16.8 | 13.5 | 13.4 |
| 2002-2006 | 16.8 | 14.9 | 11.9 |
| 2007-2011 | 16.8 | 13.7 | 12.0 |
| 2012-2016 | 16.8 | 12.7 | 11.4 |

**Supplemental Table S8**. Yearly summary of Illinois land area covered by row crops (%), and the use of herbicide-tolerant (HT) crops. Areas are from annual USDA NASS CDL spatial datasets, and proportion of herbicide tolerant crops are from the USDA Economic Research Center’s values published in 2016. Data for proportion of herbicide tolerate crop was not available before 2000, thus the estimated values for the 5-year cycle that covered 1997-2001 were derived from only two years of data. **Area estimates were not available for 2016; we used the values for 2015 as an estimate for 2016.

|  | **Corn** | |  | **Soybean** | |
| --- | --- | --- | --- | --- | --- |
| **Time** | **Area (% of IL)** | **Proportion HT** |  | **Area (% of IL)** | **Proportion HT** |
| 2000 | 28.4 | 0.04 |  | 29.5 | 0.44 |
| 2001 | 29.0 | 0.04 |  | 29.2 | 0.64 |
| 2002 | 29.6 | 0.04 |  | 30.2 | 0.71 |
| 2003 | 28.8 | 0.05 |  | 26.8 | 0.77 |
| 2004 | 30.6 | 0.07 |  | 28.0 | 0.81 |
| 2005 | 30.4 | 0.11 |  | 26.6 | 0.81 |
| 2006 | 28.2 | 0.31 |  | 25.8 | 0.87 |
| 2007 | 32.5 | 0.55 |  | 20.4 | 0.88 |
| 2008 | 30.4 | 0.67 |  | 22.3 | 0.87 |
| 2009 | 30.8 | 0.74 |  | 23.3 | 0.90 |
| 2010 | 34.0 | 0.67 |  | 23.9 | 0.89 |
| 2011 | 35.6 | 0.72 |  | 25.0 | 0.92 |
| 2012 | 34.0 | 0.71 |  | 23.9 | 0.90 |
| 2013 | 31.9 | 0.85 |  | 25.0 | 0.92 |
| 2014 | 31.9 | 0.88 |  | 26.2 | 0.91 |
| 2015 | 32.0 | 0.92 |  | 26.3 | 0.93 |
| 2016 | 32.0** | 0.91 |  | 26.3** | 0.94 |

**Supplemental Table S9**. Cropland milkweed densities used in different scenarios of our MRU estimates. Pre-HT values were used to estimate densities in crop fields that did not use herbicide tolerant crops, post-HT values used for crop fields that did use herbicide tolerant crops. See Supplemental Table S3 for the derivation of post-HT values. Pre-HT values in the optimistic and best estimate scenarios were derived from Supplemental Table S2; for the pessimistic scenario, we applied the 96.5% decline observed by Hartzler (2010) to the post-HT values for Illinois derived from Schutte et al. (2010).

|  | **Scenario** | | |
| --- | --- | --- | --- |
|  | **Optimistic** | **Best estimate** | **Pessimistic** |
|  |  |  |  |
| pre-HT | corn, 154.7;  soy, 135.1 | corn, 154.7;  soy, 135.1 | 243.14 |
|  |  |  |  |
| post-HT | 8.51 | 8.51 | 8.51 |

**Supplemental Table S10**. The area covered by a single *A. syriaca* stem in different MRU scenarios. These values were used to convert between the measures of milkweed density in agricultural studies (stems per unit area) to the abundance measures from CTAP surveys (% cover).

| **Scenario** | | |
| --- | --- | --- |
| **Optimistic** | **Best estimate** | **Pessimistic** |
| 0.04 m2 | 0.0625 m2 | 0.1111 m2 |

**Supplemental Table S11.** Site-level correlates of *A. syriaca* abundance increase in grassland habitats.

| **Explanatory variable** | | **Statistic** | **C.I. (95%)** |  |  | **Quadratic Term** | **P** | |
| --- | --- | --- | --- | --- | --- | --- | --- | --- |
|  | |  |  |  |  |  |  | |
| *Geographic coordinates* | |  |  |  |  |  |  | |
| Latitude | | r = -0.039 | (-0.36, 0.21) |  |  | positive | 0.58 | |
| Longitude | | r = 0.059 | (-0.17, 0.4) |  |  | positive | 0.92 | |
|  | |  |  |  |  |  |  | |
| *Surrounding Land Use* | |  |  |  |  |  |  | |
| Distance to row crops (km) | | r = -0.052 | (-0.41, 0.21) |  |  | positive | 0.628 | |
| Proportion crop cover (NLCD) | | r = 0.020 | (-0.26, 0.33) |  |  | positive | 0.181 | |
| Proportion developed land (NLCD) | | r = 0.114 | (-0.06, 0.56) |  |  | negative | 0.26 | |
| Proportion herbaceous cover (NLCD) | | r = -0.019 | (-0.33, 0.26) |  |  | positive | 0.314 | |
| Proportion woody-dominated cover (NLCD) | | r = -0.101 | (-0.49, 0.10) |  |  | positive | 0.708 | |
| *Introduced species* | |  |  |  |  |  |  | |
| Proportion non-native species: | |  |  |  |  |  |  | |
| first site visit | | r = 0.056 | (-0.17, 0.41) |  |  | negative | 0.232 | |
| rate of change | | **r = -0.225** | **(-0.75, -0.17)** |  |  | negative | 0.295 | |
|  | |  |  |  |  |  |  | |
| Non-native ground cover: | |  |  |  |  |  |  | |
| first site visit | | r = 0.02 | (-0.24, 0.34) |  |  | positive | 0.119 | |
| rate of change | | **r = -0.285** | **(-0.9, -0.28)** |  |  | positive | 0.455 | |
| *Plant community* | |  |  |  |  |  |  | |
| Proportion vegetation cover: | |  |  |  |  |  |  | |
| first site visit | | r = 0.067 | (-0.17, 0.41) |  |  | positive | 0.577 | |
| rate of change | | **r = -0.158** | **(-0.62, -0.03)** |  |  | positive | 0.419 | |
| Shrub stems: | |  |  |  |  |  |  | |
| first site visit | | **r = -0.218** | **(-0.72, -0.12)** |  |  | **positive** | **0.005** | |
| rate of change | | **r = 0.173** | **(0.06, 0.66)** |  |  | negative | 0.218 | |
| Tree basal area: | |  |  |  |  |  |  | |
| first site visit | | r = 0.08 | (-0.16, 0.54) |  |  | positive | 0.784 | |
| rate of change | | **r = -0.339** | **(-0.96, -0.36)** |  |  | positive | 0.645 | |
| Diversity ground cover: | |  |  |  |  |  |  | |
| first site visit | | **r = -0.162** | **(-0.6, -0.03)** |  |  | positive | 0.316 | |
| rate of change | | **r = 0.474** | **(0.27, 1)** |  |  | positive | 0.567 | |
| Mean *C* of ground cover: | |  |  |  |  |  |  | |
| first site visit | | r = 0.088 | (-0.1, 0.46) |  |  | negative | 0.475 | |
| rate of change | | r = -0.044 | (-0.37, 0.21) |  |  | positive | 0.785 | |
|  | |  |  |  |  |  |  | |
| *Site Level Land Use and Management* | | **Statistic** | **P** |  |  |  |  | |
| Plant community type | | F4,43 = 0.881 | 0.484 |  |  | N/A |  | |
| Mowing frequency | | F2,36 = 1.279 | 0.293 |  |  | N/A |  | |
|  | | | | | | |

**Supplemental Table S12.** Site-level correlates of *A. verticillata* abundance increase in grassland habitats.

| **Explanatory variable** | | **Statistic** | **C.I. (95%)** |  |  | **Quadratic Term** | **P** | |
| --- | --- | --- | --- | --- | --- | --- | --- | --- |
|  | |  |  |  |  |  |  | |
| *Geographic coordinates* | |  |  |  |  |  |  | |
| Latitude | | r = -0.112 | (-0.66, 0.33) |  |  | negative | 0.663 | |
| Longitude | | r = -0.085 | (-0.63, 0.28) |  |  | negative | 0.187 | |
|  | |  |  |  |  |  |  | |
| *Surrounding Land Use* | |  |  |  |  |  |  | |
| Distance to row crops (km) | | **r = -0.405** | **(-1, -0.33)** |  |  | **positive** | **0.048** | |
| Proportion crop cover (NLCD) | | **r = 0.276** | **(0.11, 1)** |  |  | positive | 0.517 | |
| Proportion developed land (NLCD) | | r = -0.16 | (-0.94, 0.1) |  |  | negative | 0.741 | |
| Proportion herbaceous cover (NLCD) | | r = -0.11 | (-0.76, 0.2) |  |  | positive | 0.167 | |
| Proportion woody-dominated cover (NLCD) | | r = -0.111 | (-0.72, 0.2) |  |  | positive | 0.554 | |
| *Introduced species* | |  |  |  |  |  |  | |
| Proportion non-native species: | |  |  |  |  |  |  | |
| first site visit | | **r = 0.351** | **(0.05, 1)** |  |  | negative | 0.194 | |
| rate of change | | r = -0.276 | (-1, 0.11) |  |  | **negative** | **0.037** | |
|  | |  |  |  |  |  |  | |
| Non-native ground cover: | |  |  |  |  |  |  | |
| first site visit | | **r = 0.403** | **(0.3, 1)** |  |  | positive | 0.733 | |
| rate of change | | **r = -0.456** | **(-1, -0.32)** |  |  | positive | 0.918 | |
| *Plant community* | |  |  |  |  |  |  | |
| Proportion vegetation cover: | |  |  |  |  |  |  | |
| first site visit | | r = 0.186 | (-0.06, 0.96) |  |  | positive | 0.41 | |
| rate of change | | r = -0.125 | (-0.87, 0.22) |  |  | positive | 0.871 | |
| Shrub stems: | |  |  |  |  |  |  | |
| first site visit | | r = -0.145 | (-0.92, 0.13) |  |  | positive | 0.467 | |
| rate of change | | r = -0.109 | (-0.92, 0.23) |  |  | positive | 0.52 | |
| Tree basal area: | |  |  |  |  |  |  | |
| first site visit | | r = -0.188 | (-1, 0.06) |  |  | positive | 0.812 | |
| rate of change | | r = -0.171 | (-0.95, 0.09) |  |  | negative | 0.825 | |
| Diversity ground cover: | |  |  |  |  |  |  | |
| first site visit | | **r = -0.268** | **(-1, -0.1)** |  |  | positive | 0.401 | |
| rate of change | | r = -0.122 | (-0.84, 0.2) |  |  | positive | 0.8 | |
| Mean *C* of ground cover: | |  |  |  |  |  |  | |
| first site visit | | **r = -0.386** | **(-1, -0.31)** |  |  | positive | 0.332 | |
| rate of change | | r = 0.146 | (-0.24, 0.74) |  |  | negative | 0.561 | |
|  | |  |  |  |  |  |  | |
| *Site Level Land Use and Management* | | Statistic | P |  |  |  |  | |
| Plant community type | | F3,13 = 1.384 | 0.269 |  |  | N/A |  | |
| Mowing frequency | | **F2,12 = 2.904** | **0.019** |  |  | N/A |  | |
|  | | | | | | |

**Supplemental Table S13.** Site-level correlates of *C. laeve* abundance increase in grassland habitats.

| **Explanatory variable** | | **Statistic** | **C.I. (95%)** |  |  | **Quadratic Term** | **P** | |
| --- | --- | --- | --- | --- | --- | --- | --- | --- |
|  | |  |  |  |  |  |  | |
| *Geographic coordinates* | |  |  |  |  |  |  | |
| Latitude | | r = 0.031 | (-0.42, 0.58) |  |  | negative | 0.467 | |
| Longitude | | r = 0.149 | (-0.2, 0.78) |  |  | positive | 0.093 | |
|  | |  |  |  |  |  |  | |
| *Surrounding Land Use* | |  |  |  |  |  |  | |
| Distance to row crops (km) | | r = -0.063 | (-0.62, 0.41) |  |  | negative | 0.481 | |
| Proportion crop cover (NLCD) | | **r = 0.6** | **(0.71, 1)** |  |  | negative | 0.51 | |
| Proportion developed land (NLCD) | | r = -0.19 | (-0.86, 0.18) |  |  | positive | 0.428 | |
| Proportion herbaceous cover (NLCD) | | **r = -0.408** | **(-1, -0.33)** |  |  | **negative** | **0.022** | |
| Proportion woody-dominated cover (NLCD) | | **r = -0.49** | **(-1, -0.48)** |  |  | positive | 0.549 | |
| *Introduced species* | |  |  |  |  |  |  | |
| Proportion non-native species: | |  |  |  |  |  |  | |
| first site visit | | **r = 0.262** | **(0.04, 1)** |  |  | negative | 0.53 | |
| rate of change | | r = 0.012 | (-0.47, 0.52) |  |  | negative | 0.788 | |
|  | |  |  |  |  |  |  | |
| Non-native ground cover: | |  |  |  |  |  |  | |
| first site visit | | r = -0.11 | (-0.71, 0.27) |  |  | negative | 0.784 | |
| rate of change | | r = 0.233 | (-0.1, 0.97) |  |  | positive | 0.528 | |
| *Plant community* | |  |  |  |  |  |  | |
| Proportion vegetation cover: | |  |  |  |  |  |  | |
| first site visit | | r = -0.171 | (-0.94, 0.16) |  |  | negative | 0.541 | |
| rate of change | | r = -0.014 | (-0.54, 0.46) |  |  | positive | 0.856 | |
| Shrub stems: | |  |  |  |  |  |  | |
| first site visit | | r = -0.07 | (-0.64, 0.47) |  |  | positive | 0.505 | |
| rate of change | | r = -0.165 | (-0.84, 0.29) |  |  | positive | 0.185 | |
| Tree basal area: | |  |  |  |  |  |  | |
| first site visit | | r = 0.009 | (-0.47, 0.62) |  |  | positive | 0.86 | |
| rate of change | | r = -0.045 | (-0.63, 0.48) |  |  | positive | 0.886 | |
| Diversity ground cover: | |  |  |  |  |  |  | |
| first site visit | | r = -0.029 | (-0.54, 0.46) |  |  | positive | 0.8 | |
| rate of change | | **r = -0.38** | **(-1, -0.18)** |  |  | positive | 0.93 | |
| Mean *C* of ground cover: | |  |  |  |  |  |  | |
| first site visit | | **r = -0.554** | **(-1, -0.57)** |  |  | **negative** | **0.006** | |
| rate of change | | r = 0.063 | (-0.37, 0.64) |  |  | negative | 0.927 | |
|  | |  |  |  |  |  |  | |
| *Site Level Land Use and Management* | | **Statistic** | **P** |  |  |  |  | |
| Plant community type | | F2,13 = 0.110 | 0.792 |  |  | N/A |  | |
| Mowing frequency | | **F2,13 = 3.136** | **0.030** |  |  | N/A |  | |
|  | | | | | | |

**Supplemental Table S14.** Site-level correlates of *A. incarnata* abundance increase in wetland habitats.

| **Explanatory variable** | | **Statistic** | **C.I. (95%)** |  |  | **Quadratic Term** | **P** | |
| --- | --- | --- | --- | --- | --- | --- | --- | --- |
|  | |  |  |  |  |  |  | |
| *Geographic coordinates* | |  |  |  |  |  |  | |
| Latitude | | r = -0.07 | (-0.52, 0.24) |  |  | negative | 0.62 | |
| Longitude | | **r = 0.212** | **(0.04, 0.81)** |  |  | **positive** | **0.041** | |
|  | |  |  |  |  |  |  | |
| *Surrounding Land Use* | |  |  |  |  |  |  | |
| Distance to row crops (km) | | r = 0.065 | (-0.28, 0.52) |  |  | positive | 0.983 | |
| Proportion crop cover (NLCD) | | r = -0.026 | (-0.46, 0.37) |  |  | negative | 0.292 | |
| Proportion developed land (NLCD) | | r = 0.079 | (-0.34, 0.6) |  |  | negative | 0.18 | |
| Proportion herbaceous cover (NLCD) | | r = -0.096 | (-0.72, 0.27) |  |  | negative | 0.62 | |
| Proportion woody-dominated cover (NLCD) | | r = 0.05 | (-0.36, 0.52) |  |  | negative | 0.822 | |
| *Introduced species* | |  |  |  |  |  |  | |
| Proportion non-native species: | |  |  |  |  |  |  | |
| first site visit | | **r = -0.351** | **(-1, -0.28)** |  |  | positive | 0.865 | |
| rate of change | | **r = 0.25** | **(0.02, 0.95)** |  |  | negative | 0.069 | |
|  | |  |  |  |  |  |  | |
| Non-native ground cover: | |  |  |  |  |  |  | |
| first site visit | | **r = -0.317** | **(-1, -0.24)** |  |  | positive | 0.138 | |
| rate of change | | **r = -0.368** | **(-1, -0.32)** |  |  | negative | 0.079 | |
| *Plant community* | |  |  |  |  |  |  | |
| Proportion vegetation cover: | |  |  |  |  |  |  | |
| first site visit | | r = -0.158 | (-0.71, 0.1) |  |  | positive | 0.875 | |
| rate of change | | **r = 0.256** | **(0.1, 0.98)** |  |  | positive | 0.544 | |
| Shrub stems: | |  |  |  |  |  |  | |
| first site visit | | r = -0.128 | (-0.68, 0.14) |  |  | negative | 0.683 | |
| rate of change | | r = 0.084 | (-0.39, 0.64) |  |  | negative | 0.313 | |
| Tree basal area: | |  |  |  |  |  |  | |
| first site visit | | r = -0.034 | (-0.56, 0.37) |  |  | positive | 0.524 | |
| rate of change | | r = 0.011 | (-0.43, 0.47) |  |  | negative | 0.59 | |
| Diversity ground cover: | |  |  |  |  |  |  | |
| first site visit | | **r = 0.276** | **(0.14, 0.94)** |  |  | negative | 0.116 | |
| rate of change | | **r = -0.238** | **(-0.91, -0.07)** |  |  | **positive** | **0.01** | |
| Mean *C* of ground cover: | |  |  |  |  |  |  | |
| first site visit | | r = 0.157 | (-0.1, 0.71) |  |  | negative | 0.82 | |
| rate of change | | r = -0.15 | (-0.71, 0.13) |  |  | **negative** | **0.02** | |
|  | |  |  |  |  |  |  | |
| *Site Level Land Use and Management* | | **Statistic** | **P** |  |  |  |  | |
| Plant community type | | F2,22 = 0.535 | 0.526 |  |  | N/A |  | |
| Mowing frequency | | F2,22 = 0.022 | 0.915 |  |  | N/A |  | |
|  | | | | | | |
