# Supplementary figures and images for: Long-Term Trends in Midwestern Milkweed Abundances and Their Relevance to Monarch Butterfly Declines
Source: Oxford University Press journal article supplement (doi:10.1093/biosci/biw186), 2017-03-08

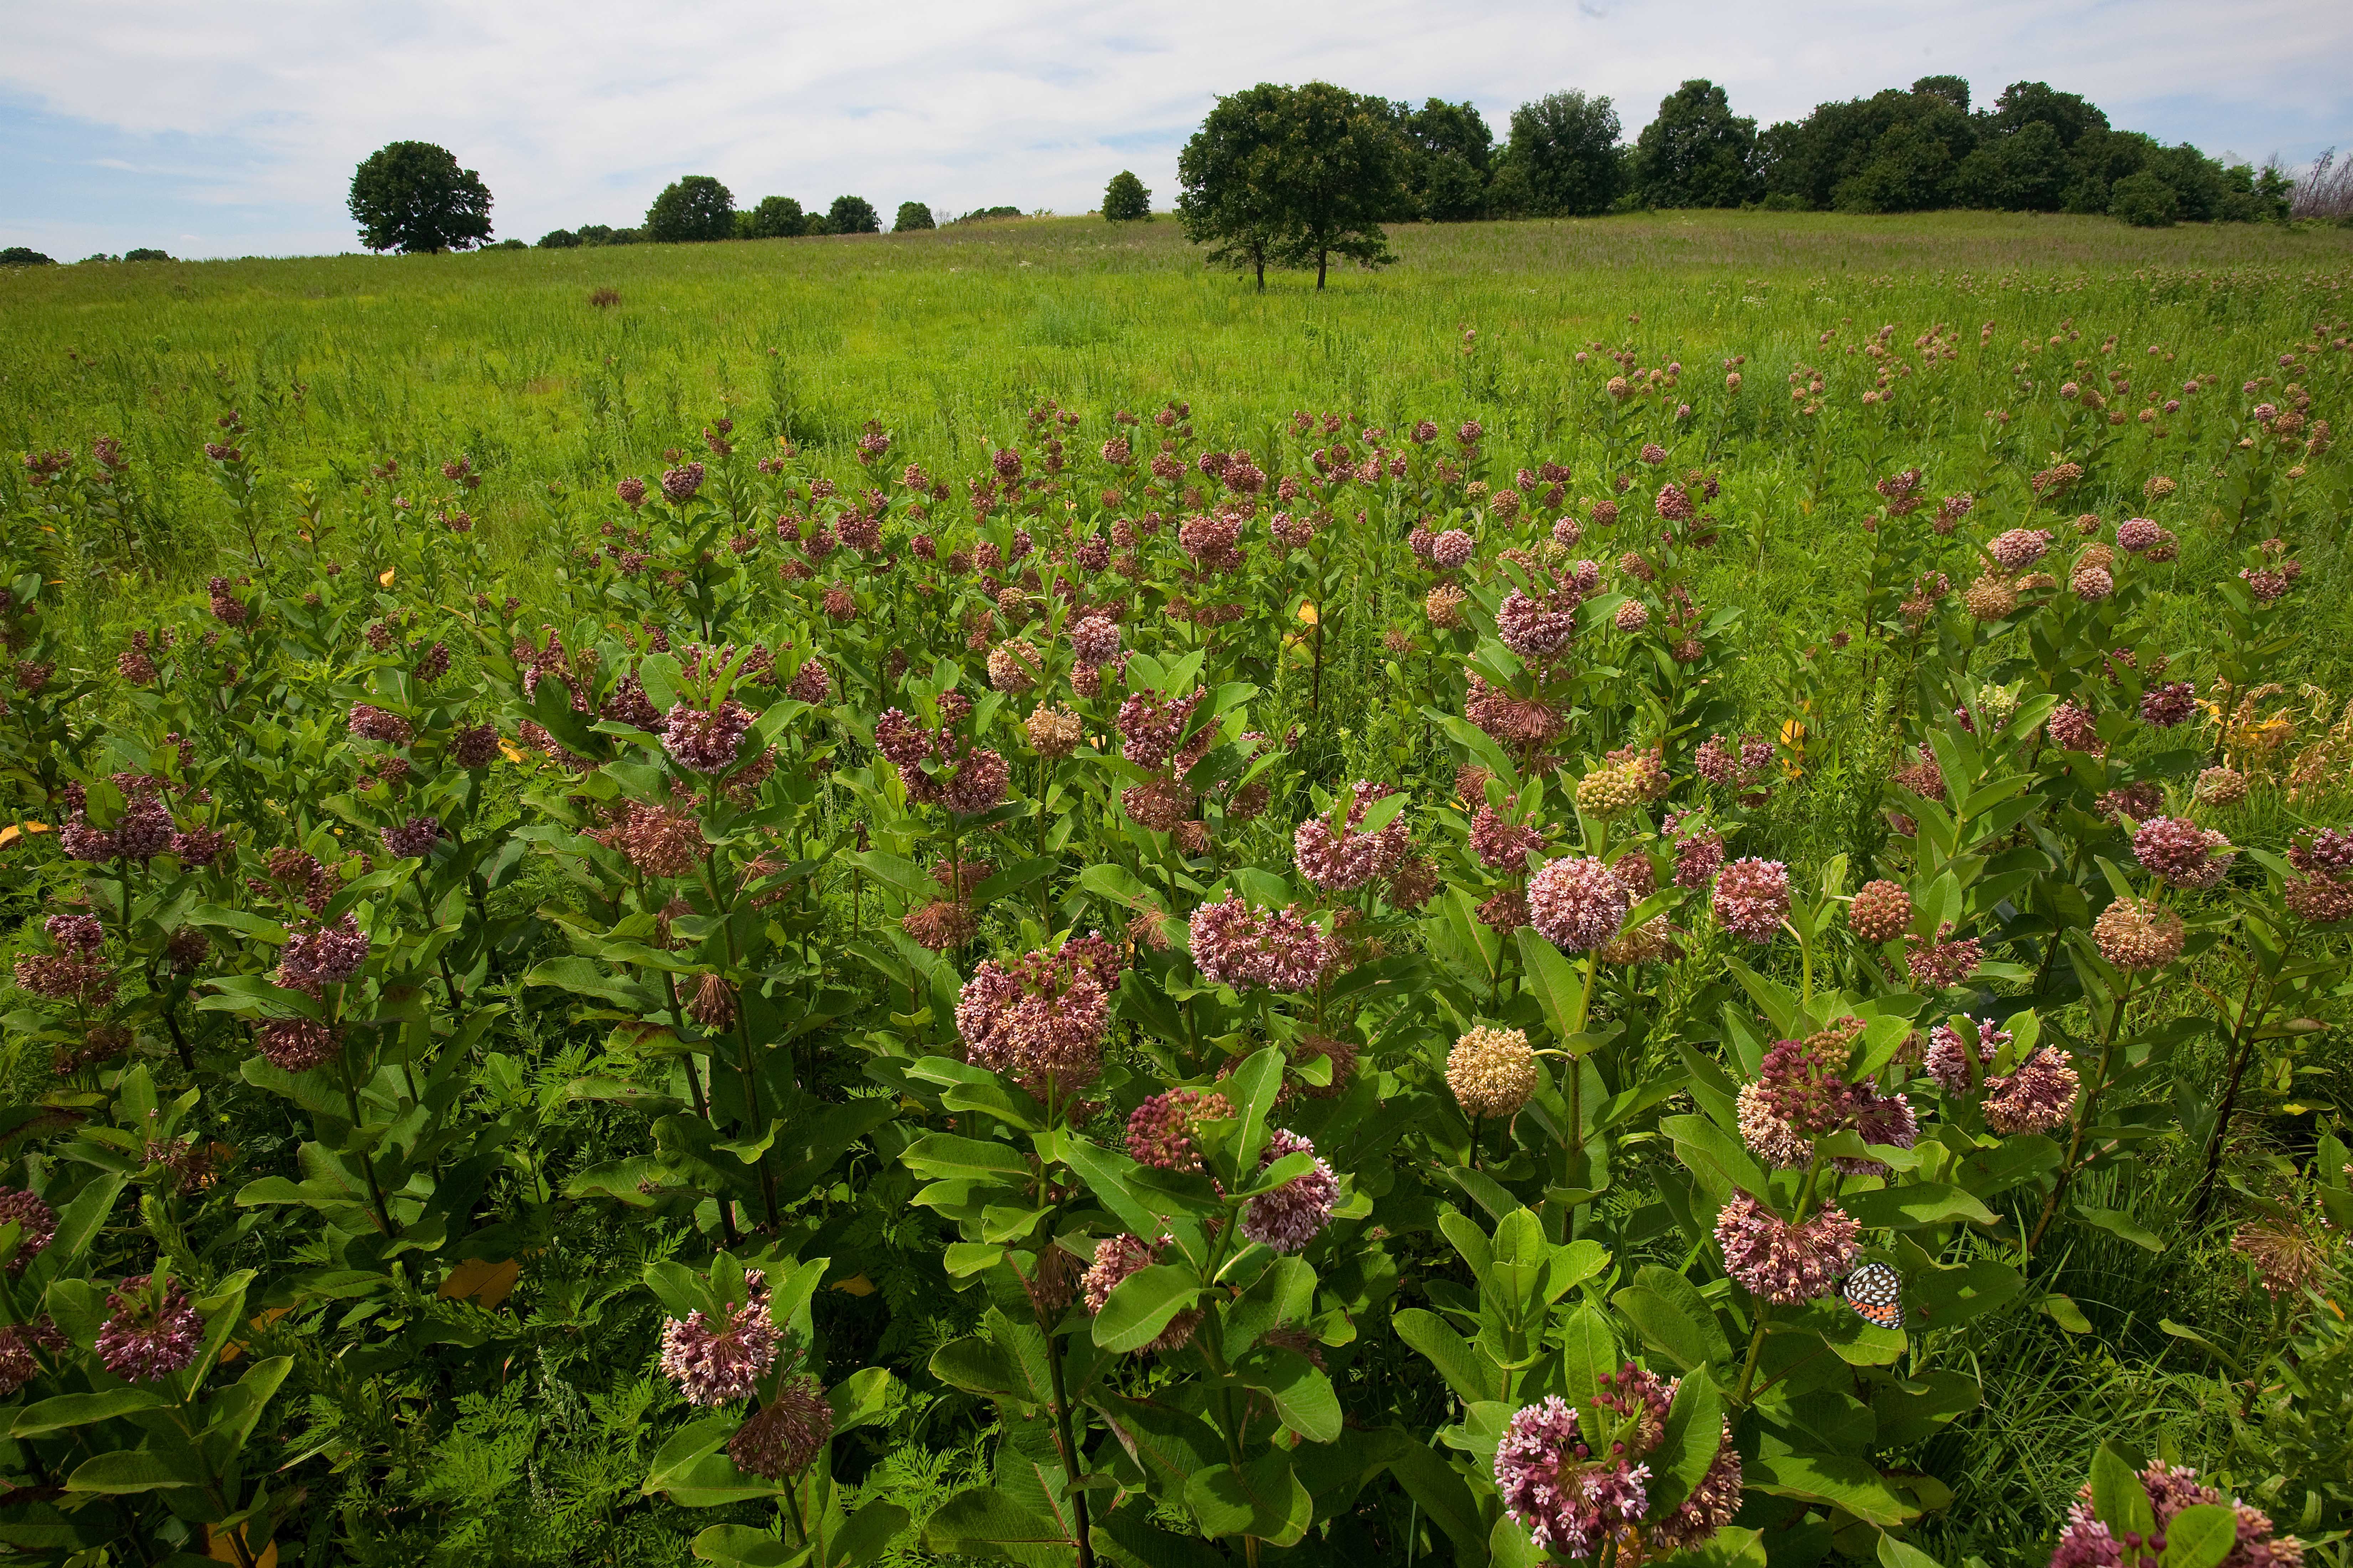

Supplement: biw186_Supp.zip [file biw186_Supp.zip › Asclepias syriacus Scrub oak sand prairie nature preserve.jpg]

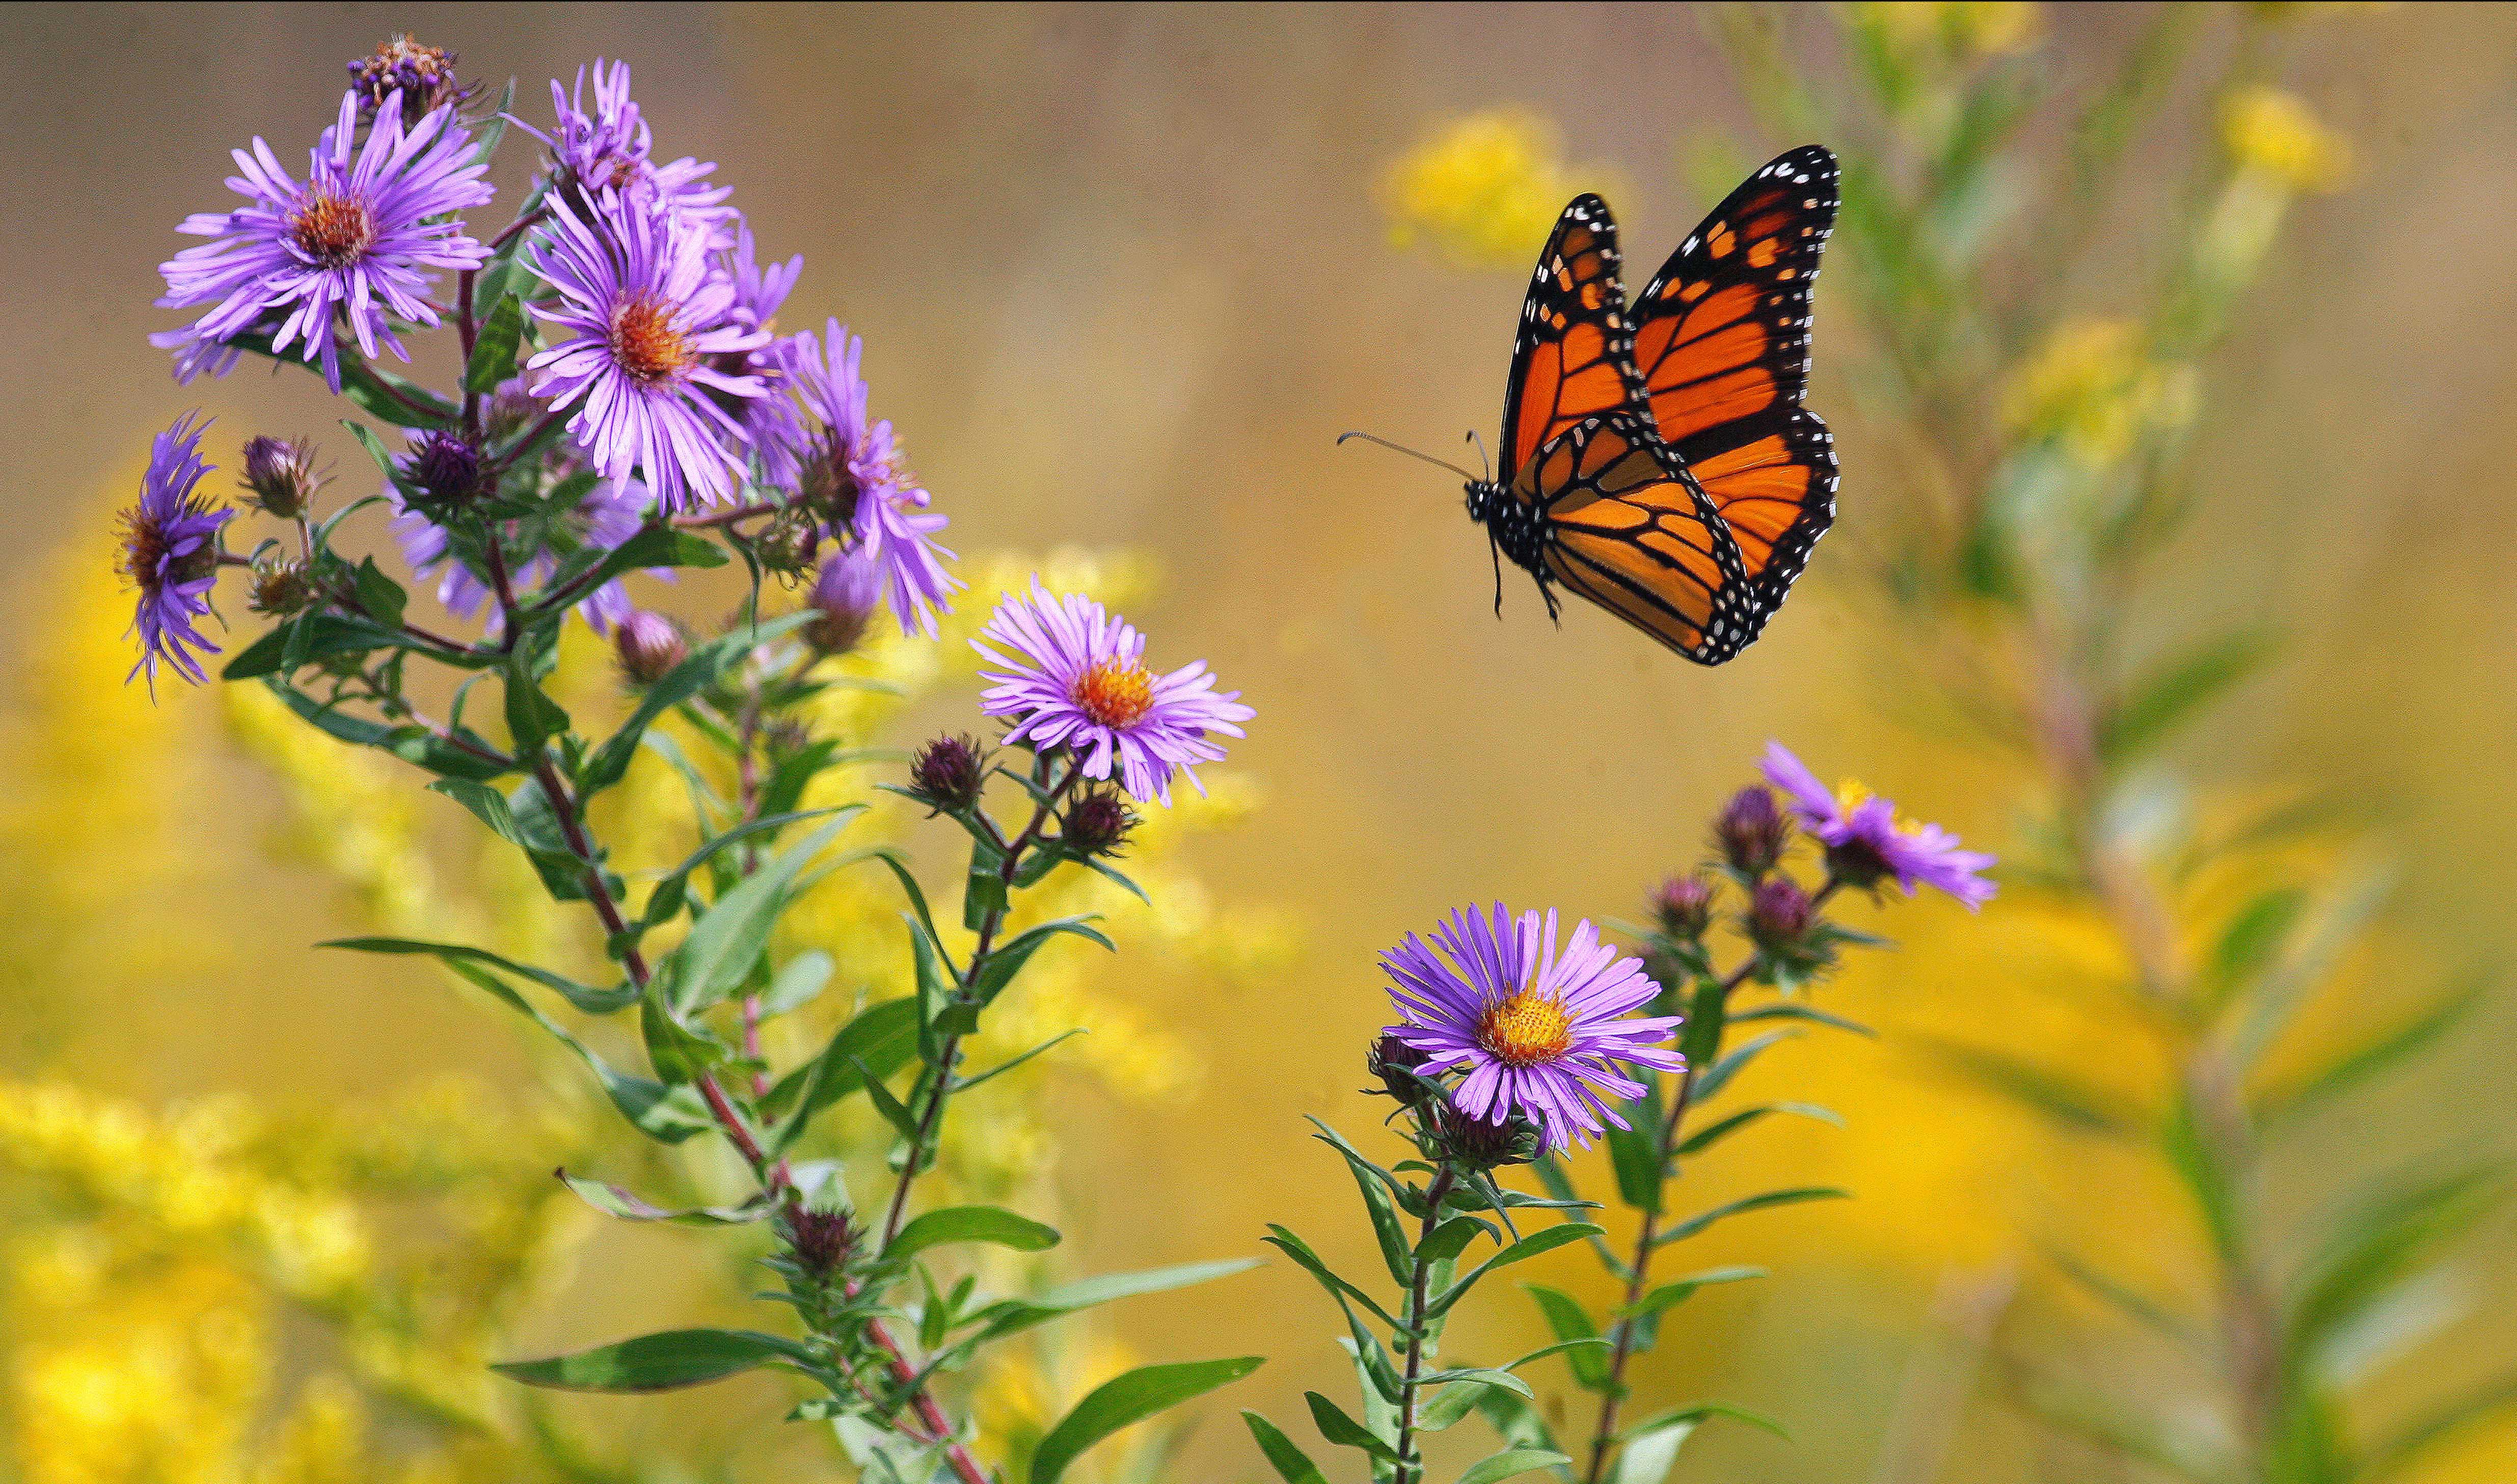

Supplement: biw186_Supp.zip [file biw186_Supp.zip › monarch new england aster.jpg]
